# Supplementary material for: N-acetyl Cysteine Coated Gallium Particles Demonstrate High Potency against Pseudomonas aeruginosa PAO1
Source: PubMed Central journal article supplement (PMC6789799; doi:10.3390/pathogens8030120), 2019-08-01
Supplement: pathogens-08-00120-s001.pdf [file pathogens-08-00120-s001.pdf]

## Biofilm formation of PAO1 with NAC treatment

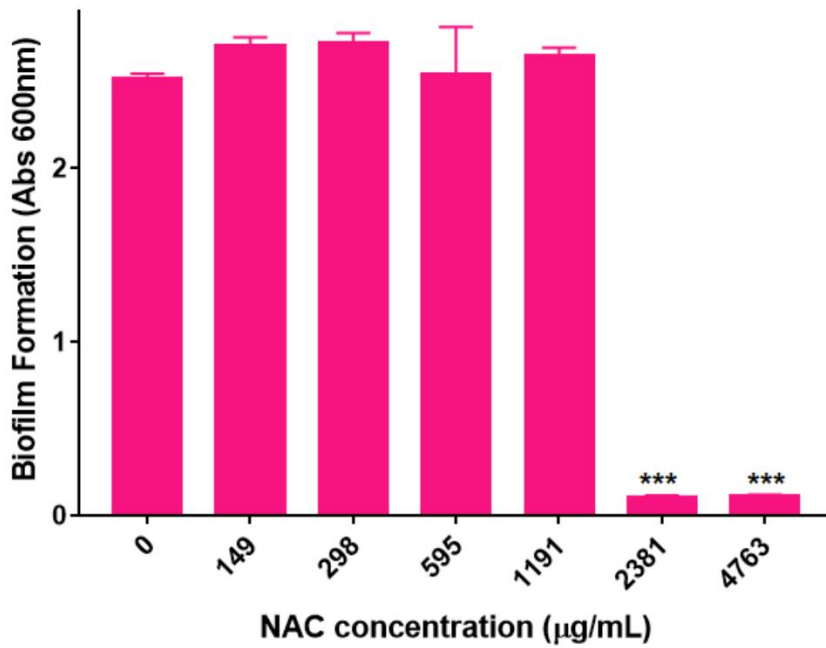

Supplementary Figure 1. Inhibition of PAO1 biofilms using NAC. Biofilms were grown in nunc TSP plate and lids for 24 hrs in the presence of NAC at 37°C. Biofilm formation reduced and prevented with increasing NAC concentrations. (\*\*\*) $p \leq 0.001$  compared to 0 µg/mL concentration, Paired T-test).
